# Supplementary material for: Synthesis of non-peripheral amine substituted nickel(ii) phthalocyanine capped gold nanoparticles and their immobilization on electrode for the electrocatalytic oxidation of hydrazine
Source: Royal Society of Chemistry journal article supplement (doi:10.1039/c2ra22895e), 2012-12-04
Supplement: c2ra22895e.pdf [file c2ra22895e.pdf]

Electronic Supplementary Material

**Synthesis of non-peripheral amine substituted nickel(II) phthalocyanine capped gold nanoparticles and their immobilization on electrode for the electrocatalytic oxidation of hydrazine**

**A. John Jeevagan and S. Abraham John\***

Centre for Nanoscience and Nanotechnology  
Department of Chemistry, Gandhigram Rural Institute  
Gandhigram – 624 302, Dindigul, India

---

\*Corresponding author: Tel: +91 451 245 2371 ; Fax : + 91 451 245 3031

E-mail : [abrajohn@yahoo.co.in](mailto:abrajohn@yahoo.co.in)

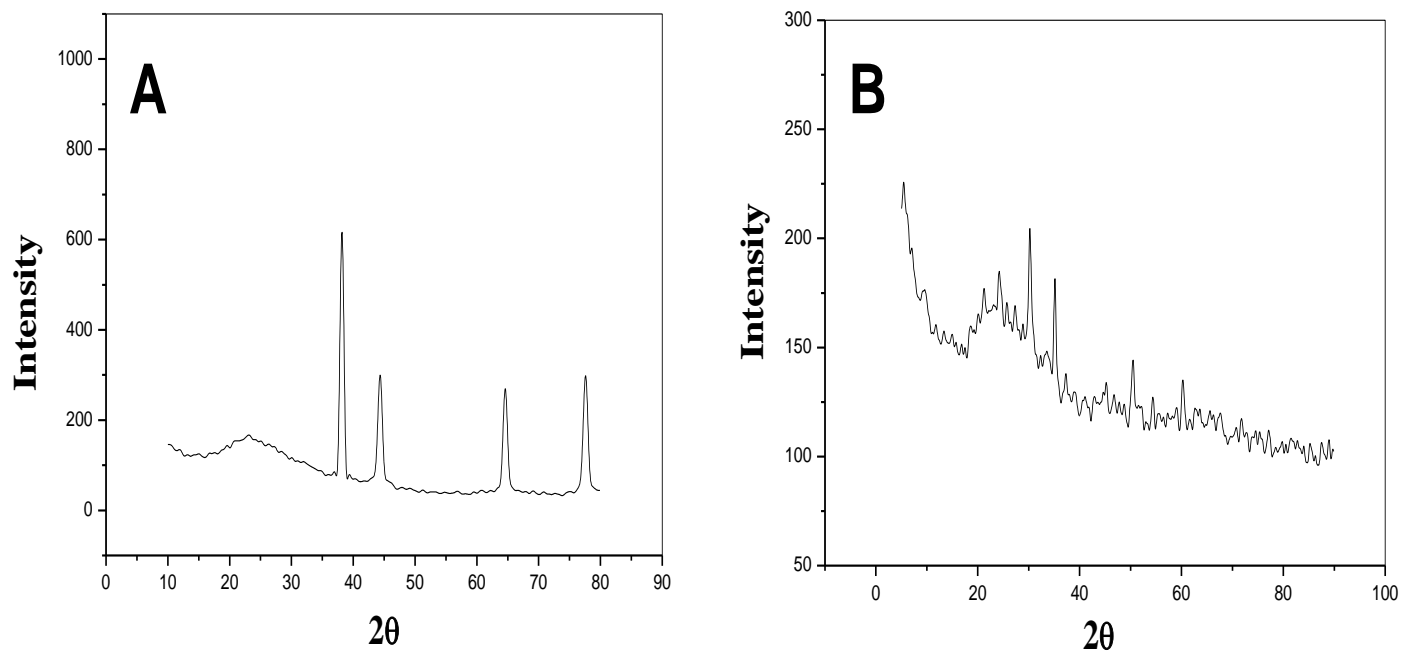

Fig. S1. X-ray diffraction pattern obtained for (A)  $4\alpha$ -Ni<sup>II</sup>TAPc-AuNPs and (B) ITO/MPTS/ $4\alpha$ -Ni<sup>II</sup>TAPc-AuNPs.

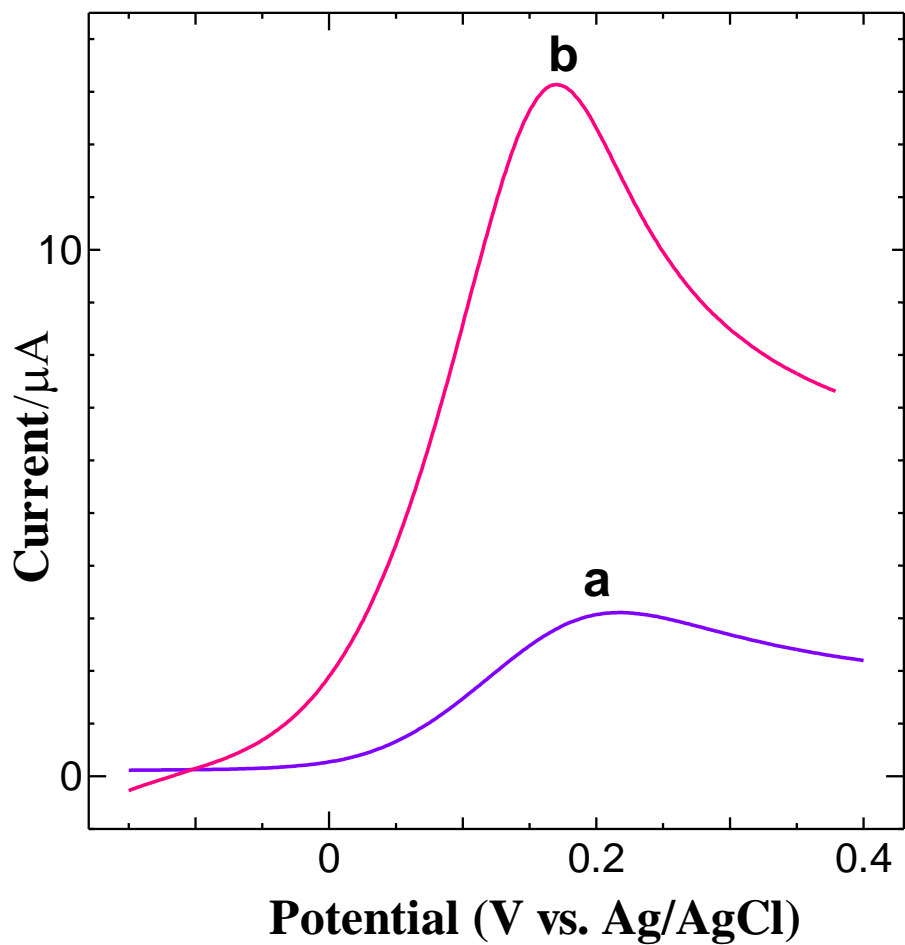

**Fig. S2.** LSVs obtained for 0.5 mM hydrazine at (a) Au/HDT/C-AuNPs and (b) Au/HDT/ $\text{Ni}^{\text{II}}$ TAPc-AuNPs modified electrodes in 0.2 M PB solution (pH 7.2) at a scan rate of  $0.05 \text{ V s}^{-1}$ .

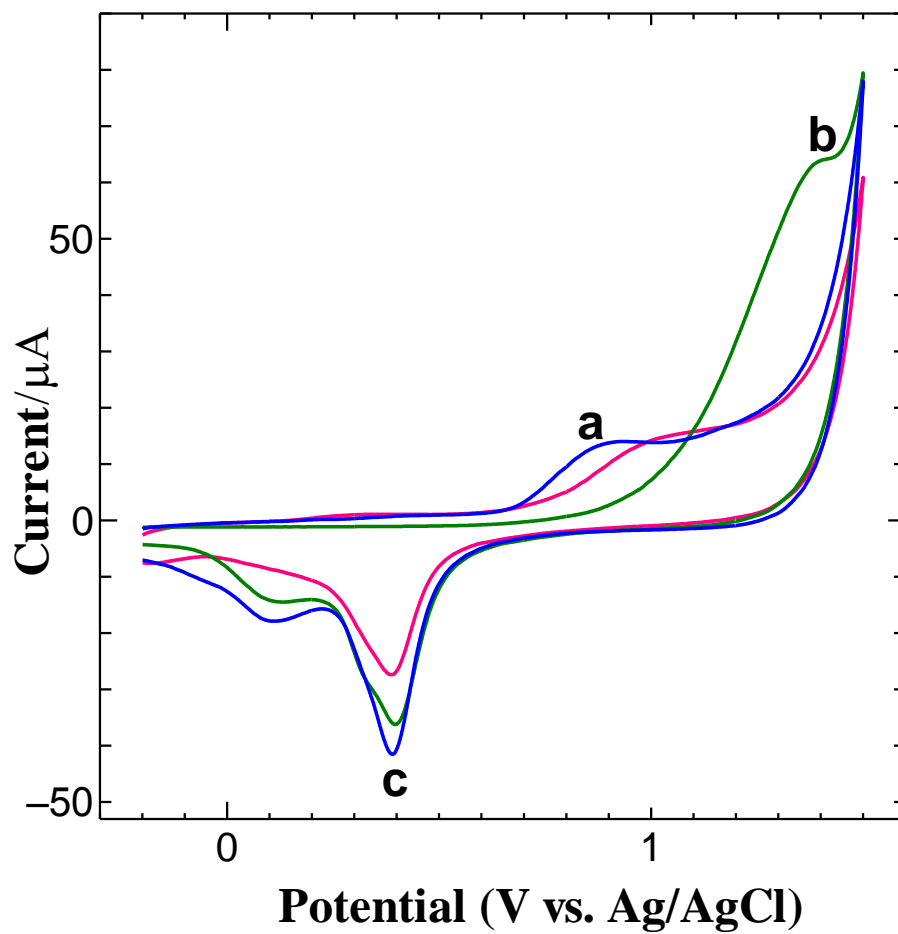

Fig. S3. CVs obtained for (a) bare Au, (b) Au/HDT/C-AuNPs and (c) Au/HDT/4 $\alpha$ -Ni<sup>II</sup>TAPc-AuNPs modified electrodes in 0.2 M PB solution (pH 7.2) at a scan rate of 0.05 V s<sup>-1</sup>.

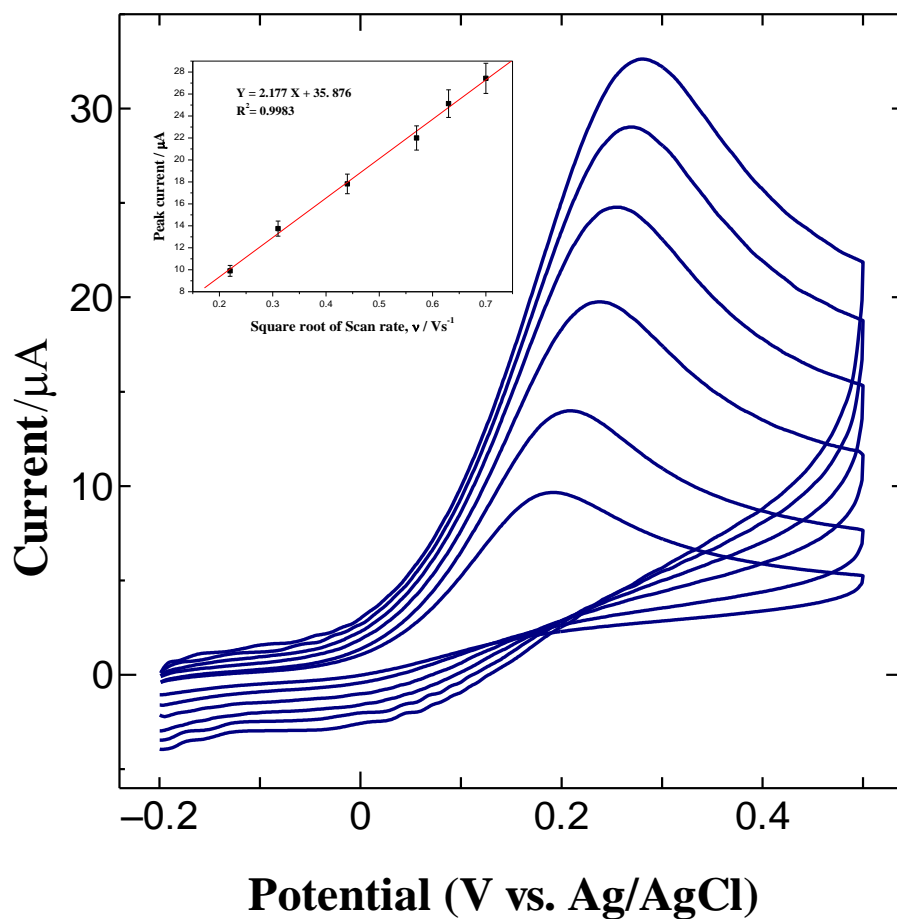

Fig. S4. CVs obtained for 0.5 mM hydrazine at Au/HDT/4 $\alpha$ -Ni<sup>II</sup>TAPc-AuNPs modified Au electrode in 0.2 M PB solution (pH 7.2) at scan rates of 0.05, 0.1, 0.2, 0.3, 0.4 and 0.5 V s<sup>-1</sup>.

Table S1

Table for impedance data

| Parameter                             | Bare Au                | Au/HDT                 | Au/HDT /4 $\alpha$ -<br>Ni <sup>II</sup> TAPc-<br>AuNPs |
|---------------------------------------|------------------------|------------------------|---------------------------------------------------------|
| R <sub>s</sub> (k $\Omega$ )          | 0.211                  | 0.120                  | 0.110                                                   |
| CPE (F)                               | 4.288 $\times 10^{-6}$ | 7.092 $\times 10^{-7}$ | 5.868 $\times 10^{-7}$                                  |
| R <sub>CT</sub> (k $\Omega$ )         | 12.93                  | 103.67                 | 17.55                                                   |
| k <sub>et</sub> (cm s <sup>-1</sup> ) | 6.628 $\times 10^{-4}$ | 8.278 $\times 10^{-5}$ | 4.889 $\times 10^{-4}$                                  |
